# Supplementary material for: Preanalytical Conditions and DNA Isolation Methods Affect Telomere Length Quantification in Whole Blood
Source: PLoS One. 2015 Dec 4;10(12):e0143889. doi: 10.1371/journal.pone.0143889 (PMC4670203; doi:10.1371/journal.pone.0143889)
Supplement: S1 Table — Corresponding to Fig 5, levels of significance were calculated for different DNA isolation methods. Bonferroni-correction was applied to correct for multiple testing, thus a p-value of p < 0.00042 was considered to be statistically significant. (XLSX) [file pone.0143889.s005.xlsx]

## Sheet: Tabelle1
	non-degraded																degraded
	non-frozen								frozen								non-frozen								frozen
		QIAGEN	Marcherey-Nagel	5prime	Stratec	IPP				QIAGEN	Marcherey-Nagel	5prime	Stratec	IPP				QIAGEN	Marcherey-Nagel	5prime	Stratec	IPP				QIAGEN	Marcherey-Nagel	5prime	Stratec	IPP
	Invitrogen	0.000168666	0.361378	0.0301405	0.00602301	0.00602245			Invitrogen	0.00413018	0.560611	0.05658	0.446328	1.05058e-07			Invitrogen	0.721906	0.268836	0.0384494	0.033785	1.25518e-05			Invitrogen	0.251377	0.0123561	0.0114352	6.1373e-05	4.04368e-06
	QIAGEN		0.000165618	0.00363819	0.138407	0.397829			QIAGEN		0.0103641	0.0195555	0.0222269	2.61177e-08			QIAGEN		0.204624	0.0274659	0.89822	2.94049e-06			QIAGEN		0.36824	4.36948e-05	0.0521316	1.21623e-08
	Marcherey-Nagel			1.29294e-05	0.272704	0.0259213			Marcherey-Nagel			0.263396	0.00891422	8.64986e-08			Marcherey-Nagel			0.0317128	0.300204	6.80424e-06			Marcherey-Nagel			0.00843318	0.23203	1.77733e-06
	5prime				0.0311463	0.00850424			5prime				0.734679	1.55619e-07			5prime				0.224027	0.0697824			5prime				0.666319	0.000852041
	Stratec					8.47296e-05			Stratec					7.02123e-08			Stratec					0.309057			Stratec					0.000959683
		QIAGEN	Marcherey-Nagel	5prime	Stratec	IPP				QIAGEN	Marcherey-Nagel	5prime	Stratec	IPP				QIAGEN	Marcherey-Nagel	5prime	Stratec	IPP				QIAGEN	Marcherey-Nagel	5prime	Stratec	IPP
	Invitrogen	7.96967e-05	0.179591	7.65535e-06	8.31303e-06	5.68432e-06			Invitrogen	1.74751e-05	0.000373644	0.38722	0.159076	0.000103499			Invitrogen	0.417202	0.0129502	0.802725	0.00140644	6.57739e-06			Invitrogen	0.78409	0.000874295	0.0351703	1.55329e-06	1.22932e-08
	QIAGEN		0.00163601	1.72051e-05	0.0279861	0.636142			QIAGEN		0.00742793	0.00259028	0.362573	1.85042e-05			QIAGEN		0.546937	0.0161373	0.000760551	2.86436e-07			QIAGEN		0.130276	1.21408e-05	6.48891e-05	2.73016e-09
	Marcherey-Nagel			4.3496e-08	0.00353907	3.23488e-06			Marcherey-Nagel			0.113098	0.0560628	5.41114e-06			Marcherey-Nagel			0.467972	0.131293	5.38157e-08			Marcherey-Nagel			0.0118288	0.084835	1.54196e-08
	5prime				0.618379	5.10936e-06			5prime				0.00426171	0.000206468			5prime				0.141374	5.78181e-07			5prime				0.430398	1.47734e-08
	Stratec					2.31167e-08			Stratec					8.24402e-07			Stratec					0.000565115			Stratec					0.0043592
							level of significance was calculated using the Bonferroni correction
							p=0.05	number of comparisons: 8 * 15				0.000416667
							p-values < 0.00042 were considered statistically significant and marked in red
